# Supplementary material for: Intragastric exposure to titanium dioxide nanoparticles induced nephrotoxicity in mice, assessed by physiological and gene expression modifications
Source: PubMed Central journal article supplement (PMC3605279; doi:10.1186/1743-8977-10-4), 2013-02-13
Supplement: 1743-8977-10-4-S1.pdf [file 1743-8977-10-4-S1.pdf]

### Supplementary table

Genes which related to **apoptosis, oxidative stress, immune/inflammatory, biological process, translation, cell differentiation, cell cycle, transcription, transport, metabolic process, cell component and signal transduction** altered significantly by intragastric administration with TiO<sub>2</sub> NPs for consecutive 3 months

| SYMBOL           | Sequence ID  | Ontology                                   | DiffScore | Detection Pval | SYMBOL    | Sequence ID | Ontology                                           | DiffScore | Detection Pval |
|------------------|--------------|--------------------------------------------|-----------|----------------|-----------|-------------|----------------------------------------------------|-----------|----------------|
| <b>apoptosis</b> |              |                                            |           |                |           |             |                                                    |           |                |
| 2810454F19Rik    | NM_028364    | apoptosis                                  | 13.34113  | 0              | E2f1      | NM_007891   | apoptosis                                          | -66       | 0              |
| 1700013A01Rik    | NM_028844    | apoptosis                                  | -25.9805  | 0              | Gcap27    | NM_009750   | apoptosis                                          | -16       | 0              |
| 1500005N04Rik    | NM_029634    | positive regulation of apoptosis           | 15.91376  | 0              | Figl1     | NM_021891   | negative regulation of apoptosis                   | -48       | 0.2478632      |
| Apaf1            | NM_009684    | apoptosis                                  | -19.2577  | 6.97E-08       | Fkh118    | NM_010226   | anti-apoptosis                                     | -14       | 0.01923077     |
| Aqp2             | NM_009699    | apoptosis                                  | 17.52176  | 0              | Fn1       | NM_010233   | anti-apoptosis                                     | -15       | 0.09888433     |
| Axud1            | NM_153287    | apoptosis                                  | 60.65972  | 0              | Hsp90b1   | NM_011631   | anti-apoptosis                                     | -22       | 0              |
| Bcl2l1           | NM_009743    | apoptosis                                  | 18.72365  | 0              | Id1       | NM_010495   | apoptosis                                          | 49.3      | 0              |
| Bok              | NM_016778    | apoptosis                                  | 39.3093   | 0              | Igsf4a    | NM_207675   | apoptosis                                          | 25.6      | 0              |
| Ngfrap1          | NM_009750    | apoptosis                                  | -15       | 0              | Cib1      | NM_011870   | apoptosis                                          | -14.5379  | 0              |
| Ccl19            | NM_011888    | negative regulation of leukocyte apoptosis | 83.2706   | 0              | Ccl21a    | NM_011124   | negative regulation of leukocyte apoptotic process | 28.85775  | 0              |
| Igfbp3           | NM_008343    | positive regulation of apoptosis           | 17.4      | 0              | Nrbp2     | NM_144847   | negative regulation of neuron apoptosis            | 14.2      | 0              |
| Ckap2            | NM_001004140 | apoptosis                                  | -68.3812  | 0.5929487      | Nuak2     | NM_028778   | apoptosis                                          | 30.9      | 0              |
| Cycs             | NM_007808    | apoptosis                                  | -14.5329  | 8.24E-05       | Phlda1    | NM_009344   | apoptosis                                          | -17       | 0              |
| Ddit4            | NM_029083    | apoptosis                                  | 18.33704  | 0              | Rassf5    | NM_018750   | apoptosis                                          | 13        | 0              |
| Dnase1           | NM_010061    | apoptosis                                  | 18.65256  | 0              | Sgk1      | NM_011361   | apoptosis                                          | 64.1      | 0              |
| Dymll1           | NM_019682    | apoptosis                                  | -38.0102  | 0              | Sh3rf1    | NM_021506   | induction of apoptosis                             | 14.3      | 0.04636015     |
| Dncl1            | NM_019682    | apoptosis                                  | -75.7115  | 0              | Tnfrsf12a | NM_013749   | apoptosis                                          | -15       | 0              |
| Birc5            | NM_009689    | apoptotic process                          | -101.227  | 1.63E-06       |           |             |                                                    |           |                |

| oxidative stress |           |                              |          |          |         |           |                             |          |          |  |
|------------------|-----------|------------------------------|----------|----------|---------|-----------|-----------------------------|----------|----------|--|
| Akr1c18          | NM_134066 | oxidation-reduction process  | -56.2408 | 0        | Hpd     | NM_008277 | oxidation-reduction process | 113.6206 | 0        |  |
| Cox8b            | NM_007751 | oxidation-reduction process  | 69.72996 | 0        | Heph    | NM_010417 | oxidation-reduction process | -15.1767 | 0.008052 |  |
| Creg1            | NM_011804 | oxidation-reduction process  | 27.79984 | 0        | Ifi30   | NM_023065 | oxidation-reduction process | -13.9242 | 0        |  |
| Cyb561           | NM_007805 | oxidation-reduction process  | -16.0907 | 0        | Iyd     | NM_027391 | oxidation-reduction process | 27.34662 | 0        |  |
| Cygb             | NM_030206 | response to oxidative stress | 18.93919 | 0        | Ldhd    | NM_027570 | oxidation-reduction process | 15.84247 | 0        |  |
| Cyp24a1          | NM_009996 | oxidation-reduction process  | -33.7997 | 0        | Lox     | NM_010728 | oxidation-reduction process | -19.6716 | 0.002137 |  |
| Cyp27a1          | NM_024264 | oxidation-reduction process  | 48.64927 | 0        | Nup62   | NM_053074 | oxidation-reduction process | -13.5967 | 0        |  |
| Cyp27b1          | NM_010009 | oxidation-reduction process  | 27.61457 | 0        | P4ha1   | NM_011030 | oxidation-reduction process | -19.0961 | 0        |  |
| Cyp2a4           | NM_009997 | oxidation-reduction process  | 73.28619 | 0        | Pdia6   | NM_027959 | oxidation-reduction process | -24.685  | 0        |  |
| Cyp2d9           | NM_010006 | oxidation-reduction process  | 109.1682 | 0        | Retsat  | NM_026159 | oxidation-reduction process | 57.29923 | 0        |  |
| Cyp2f2           | NM_007817 | oxidation-reduction process  | 32.47501 | 0        | Rrm2    | NM_009104 | oxidation-reduction process | -30.2434 | 0.076178 |  |
| Cyp4a12a         | NM_177406 | oxidation-reduction process  | 38.53539 | 0        | Steap1  | NM_027399 | oxidation-reduction process | -16.318  | 0.182692 |  |
| Cyp4a12b         | NM_172306 | oxidation-reduction process  | 123.5998 | 0        | Vkorc1  | NM_178600 | oxidation-reduction process | 17.13114 | 0        |  |
| Cyp4a14          | NM_007822 | oxidation-reduction process  | 46.87622 | 0        | Xdh     | NM_011723 | oxidation-reduction process | 39.8019  | 0        |  |
| Cyp4f13          | NM_022434 | oxidation-reduction process  | 24.88494 | 0        | Clpb    | NM_009191 | mitochondrion               | 13.08478 | 0        |  |
| Cyp7b1           | NM_007825 | oxidation-reduction process  | 14.40675 | 0        | Mrrp10  | NM_026154 | mitochondrion               | -19.2171 | 0        |  |
| Cxxc6            | NM_027384 | oxidation-reduction process  | -17.9376 | 0.03312  | Nudt19  | NM_033080 | mitochondrion               | -17.5475 | 0        |  |
| Dhcr7            | NM_007856 | oxidation-reduction process  | -18.1068 | 0        | Pxmp2   | NM_008993 | mitochondrion               | 17.5127  | 0        |  |
| Dio1             | NM_007860 | oxidation-reduction process  | -21.3069 | 9.65E-05 | Tcigr1  | NM_016921 | mitochondrion               | 14.09068 | 0.000405 |  |
| Fmo5             | NM_010232 | oxidation-reduction process  | 14.16068 | 0.00048  | Timm8a1 | NM_013898 | mitochondrion               | -18.5733 | 0        |  |
| Gpx7             | NM_024198 | response to oxidative stress | -32.768  | 0.005342 | Nox4    | NM_015760 | oxidation-reduction process | 28.3864  | 0        |  |
| Cyp2a5           | NM_007812 | oxidation-reduction process  | 103.5242 | 5.38E-05 | Pipox   | NM_008952 | oxidation-reduction process |          |          |  |
| Cyp2d10          | NM_010005 | oxidation-reduction process  | 15.28741 | 0        | Plod2   | NM_011961 | oxidation-reduction process |          |          |  |
| Cyp2d22          | NM_019823 | oxidation-reduction process  | 16.013   | 0.004726 | Prodh   | NM_011172 | oxidation-reduction process |          |          |  |
| Cyp2d26          | NM_029562 | oxidation-reduction process  | 35.5621  | 0        | Rdh16   | NM_009040 | oxidation-reduction process |          |          |  |

**Immune/inflammatory response**

|              |           |                                               |          |          |          |              |                                                          |          |          |
|--------------|-----------|-----------------------------------------------|----------|----------|----------|--------------|----------------------------------------------------------|----------|----------|
| Apoec1       | NM_031159 | defense response to virus                     | 16.00352 | 0        | Cxcl9    | NM_008599    | defense response to virus                                | 13.47656 | 0        |
| Bmp6         | NM_007556 | immune response                               | 15.16573 | 0.008547 | Ddb2     | NM_028119    | response to UV                                           | 18.61965 | 0.001368 |
| EG630499     | BQ951674  | immune response                               | 20.5081  | 5.71E-07 | Defb29   | NM_001001444 | defense response                                         | -20.4451 | 0        |
| C2           | NM_013484 | innate immune response                        | 27.31265 | 0        | C1qb     | NM_009777    | innate immune response                                   | 15.05448 | 0        |
| C8g          | NM_027062 | innate immune response                        | 26.13273 | 0        | Cfi      | NM_007686    | innate immune response                                   | -54.6275 | 0        |
| Camp         | NM_009921 | defense response                              | 22.88932 | 0.002137 | H2-Ab1   | NM_207105    | immune response                                          | 27.51588 | 0        |
| Cd274        | NM_021893 | negative regulation of T cell proliferation   | 20.32364 | 0        | H2-M3    | NM_013819    | alpha-beta T cell activation involved in immune response | 23.87632 | 0        |
| Cd276        | NM_133983 | T cell activation                             | -19.3847 | 0.186966 | Igflr    | NM_010513    | immune response                                          | 14.67399 | 0        |
| Cd55         | NM_010016 | innate immune response                        | -19.5801 | 0.016026 | Mbl1     | NM_010775    | innate immune response                                   | 22.35688 | 0        |
| Nrarp        | NM_025980 | negative regulation of T cell differentiation | -22.4732 | 0        | Orml     | NM_008768    | regulation of immune system process                      | 13.00049 | 0.004274 |
| Cfd          | NM_013459 | innate immune response                        | 52.09597 | 0        | Serpinc1 | NM_009776    | innate immune response                                   | 16.3852  | 0        |
| Fcgrt        | NM_010189 | immune response                               | 15.38197 | 0        | Tgfb3    | NM_011578    | immune response                                          | 13.34086 | 2.28E-06 |
| Clec2d       | NM_053109 | cellular response                             | 18.70972 | 0        | Bcl6     | NM_009744    | B cell differentiation                                   | 67.88909 | 0        |
| Coro1a       | NM_009898 | T cell homeostasis                            | 14.31374 | 0.000272 | Cd74     | NM_010545    | immune response                                          | 29.0302  | 0        |
| 120009022Rik | NM_025817 | inflammatory response                         | -37.7737 | 0        | F2r      | NM_010169    | inflammatory response                                    | 22.01432 | 0        |
| Chst1        | NM_023850 | inflammatory response                         | 14.40865 | 0        | Tlr12    | NM_205823    | inflammatory response                                    | 16.13427 | 0        |

|                           |              |                       |           |             |               |              |                          |          |          |
|---------------------------|--------------|-----------------------|-----------|-------------|---------------|--------------|--------------------------|----------|----------|
| Cxcl3                     | NM_018866    | inflammatory response | 17.08886  | 0           | Chuk          | NM_007700    | I-kappaB phosphorylation | -20.0663 | 0        |
| Cxcl2                     | NM_013655    | immune response       | 28.02162  | 0.019278    | C3            | NM_009778    | inflammatory response    | 30.23413 | 0        |
| <b>Biological process</b> |              |                       |           |             |               |              |                          |          |          |
| 0610006L08Rik             | AK002255     | Biological process    | -34.19409 | 0           | E030010A14Rik | NM_183160    | Biological process       | 25.29927 | 0        |
| 0610007P22Rik             | NM_026676    | Biological process    | 15.82568  | 0           | E130012A19Rik | NM_175332    | Biological process       | 17.65043 | 0        |
| 0610008F07Rik             | CA491940     | Biological process    | 21.98411  | 0           | E130102H24Rik | BI737778     | Biological process       | 18.9307  | 0        |
| 0610009B22Rik             | NM_025319    | Biological process    | -15.95189 | 0           | EG434674      | NM_001013820 | Biological process       | -75.3917 | 0        |
| 0610012H03Rik             | NM_028747    | Biological process    | -21.02719 | 0           | EG633640      | NM_001039244 | Biological process       | -38.4617 | 0        |
| 0710001D07Rik             | AK002941     | Biological process    | -13.75501 | 0           | EG666009      | XM_980899    | Biological process       | 22.05245 | 0        |
| 1110021J02Rik             | NM_026782    | Biological process    | -30.48447 | 0           | EG667728      | XM_003084919 | Biological process       | -43.0996 | 0        |
| 1110038B12Rik             | CB575847     | Biological process    | 29.55201  | 0           | EG667977      | AII15044     | Biological process       | 28.65119 | 0        |
| 1110069O07Rik             | NM_001029937 | Biological process    | -183.6978 | 0           | Eif1ad        | NM_027236    | Biological process       | -14.0614 | 0        |
| 11190002F15Rik            | AK138072     | Biological process    | -59.74326 | 0.3589744   | Elmod3        | NM_144917    | Biological process       | 21.08511 | 0        |
| 1190020J12Rik             | NM_001081115 | Biological process    | 32.40128  | 0           | Epb4.1l4b     | NM_019427    | Biological process       | -15.7936 | 0        |
| 1500012F01Rik             | NM_001081005 | Biological process    | 13.3711   | 0           | Ergic2        | NM_026168    | Biological process       | -14.485  | 0        |
| 1700007B13Rik             | NM_027943    | Biological process    | 25.79848  | 0           | Esm1          | NM_023612    | Biological process       | 36.74471 | 0        |
| 1700016C15Rik             | NM_027077    | Biological process    | -14.8869  | 0.02457265  | Exdl2         | NM_133798    | Biological process       | 13.7948  | 0        |
| 1700029F09Rik             | NM_029368    | Biological process    | -25.77884 | 0           | Fam173b       | NM_026546    | Biological process       | -17.7764 | 0        |
| 1700029G01Rik             | NM_025856    | Biological process    | 14.85722  | 0           | Fbxo21        | NM_145564    | Biological process       | 26.23816 | 0        |
| 1700037H04Rik             | NM_026091    | Biological process    | -25.53243 | 0           | Fbxw17        | NM_175401    | Biological process       | -22.7717 | 0        |
| 1700071K01Rik             | NM_001033765 | Biological process    | -14.47385 | 0.008547009 | Fcho1         | NM_028715    | Biological process       | 13.31341 | 0.005342 |
| 1700108L22Rik             | NM_001040399 | Biological process    | -36.23967 | 0           | Fmo4          | NM_144878    | Biological process       | 35.22079 | 0        |
| 1810015C11Rik             | BI736050     | Biological process    | 19.55207  | 0           | G630016D24Rik | NM_001033805 | Biological process       | -17.8404 | 0.00641  |
| 1810019D21Rik             | AK007545     | Biological process    | 14.23328  | 0           | Gas2l3        | NM_001079876 | Biological process       | -35.723  | 0.110993 |
| 1810022K09Rik             | NM_001099674 | Biological process    | -27.23269 | 0           | Gins2         | NM_178856    | Biological process       | -44.6598 | 0.000228 |
| 1810035L17Rik             | NM_026958    | Biological process    | -15.1156  | 0           | Glxr5         | NM_028419    | Biological process       | -14.3374 | 0        |

|               |              |                    |           |             |            |              |                    |          |          |
|---------------|--------------|--------------------|-----------|-------------|------------|--------------|--------------------|----------|----------|
| 1810044D09Rik | BI221477     | Biological process | 22.21508  | 0           | Gm853      | NM_001034872 | Biological process | -85.8885 | 0        |
| 1810063B05Rik | NM_174987    | Biological process | -17.06034 | 0           | Gpr125     | NM_133911    | Biological process | -24.3886 | 0        |
| 2010003K15Rik | NM_001195596 | Biological process | -23.61688 | 0           | Gramd1b    | NM_172768    | Biological process | -28.8616 | 0        |
| 2010007K12Rik | NM_172879    | Biological process | -16.99884 | 0           | Gstm7      | NM_026672    | Biological process | 15.23775 | 0        |
| 2010205O06Rik | NM_138646    | blood coagulation  | 29.17507  | 0           | Higd1c     | NM_199477    | Biological process | 41.43023 | 0        |
| 2010305C02Rik | NM_027249    | Biological process | -15.76085 | 0.002136752 | Hist1h2ad  | NM_178188    | Biological process | -123.951 | 0        |
| 2010317E24Rik | NM_001081085 | Biological process | -20.9388  | 0.3621795   | Hist1h2af  | NM_175661    | Biological process | -64.6447 | 0        |
| 2200001I15Rik | NM_183278    | Biological process | -28.9415  | 0           | Hist1h2ag  | NM_178186    | Biological process | -41.5075 | 0.324786 |
| 2210013K02Rik | NM_023712    | Biological process | -16.98704 | 0           | Hist1h2ah  | NM_175659    | Biological process | -124.606 | 0        |
| 2210013O21Rik | DV046611     | Biological process | -18.28412 | 0           | Hist1h2ai  | NM_178182    | Biological process | -69.9658 | 0        |
| 2210408F21Rik | AK078276     | Biological process | 36.2524   | 0           | Hist1h2ak  | NM_178183    | Biological process | -132.42  | 0        |
| 2310004I24Rik | NM_025510    | Biological process | 14.47395  | 0           | Hist1h2an  | NM_178184    | Biological process | -111.759 | 0.008547 |
| 2310005L22Rik | CF616156     | Biological process | -88.64561 | 0.003205128 | Hist1h2ao  | NM_178185    | Biological process | -113.025 | 0        |
| 2310005N03Rik | NM_025511    | Biological process | -28.58845 | 0           | Hist1h3e   | NM_178205    | Biological process | -26.3771 | 0        |
| 2310007D09Rik | NM_027975    | Biological process | -19.87851 | 0.6378205   | Hist1h3h   | NM_178206    | Biological process | -15.6458 | 0.072437 |
| 2310008M10Rik | NM_025509    | Biological process | -20.56657 | 0           | Hist1h4h   | NM_153173    | Biological process | -44.4888 | 0.048995 |
| 2310028O11Rik | NM_001163006 | Biological process | 20.08894  | 0           | Hist1h4k   | NM_178211    | Biological process | -31.3439 | 0.035385 |
| 2410006H16Rik | DV059485     | Biological process | 31.15622  | 0           | Hist1h4m   | NM_001195421 | Biological process | -14.9323 | 0.000252 |
| 2410022L05Rik | NM_025556    | Biological process | -34.9827  | 0           | Hist2h2aa1 | NM_178212    | Biological process | -31.9299 | 7.91E-05 |
| 2610002M06Rik | NM_025921    | Biological process | -13.05241 | 0.02029915  | Hist2h2aa2 | NM_013549    | Biological process | -25.4512 | 0        |
| 2610017I09Rik | BC094545     | Biological process | -16.38006 | 0           | H2-M2      | NM_008204    | Biological process | 86.8102  | 0        |
| 2610027C15Rik | NM_172145    | Biological process | -14.71094 | 0           | Hn1        | NM_008258    | Biological process | -30.8881 | 0.000128 |
| 2610301F02Rik | NM_001025576 | Biological process | 17.70654  | 0           | Igh-VJ558  | FR689186     | Biological process | 263.9346 | 0        |
| 2610510J17Rik | NM_028131    | Biological process | -14.67168 | 0.008547009 | Igk-C      | AK036494     | Biological process | 374.3439 | 0        |
| 2700097O09Rik | NM_028314    | Biological process | -13.94027 | 0           | Igk-V      | X59052       | Biological process | 67.93063 | 0        |
| 2810021O14Rik | NM_025480    | Biological process | -18.02302 | 0           | Igk-V33    | U27111       | Biological process | 148.0846 | 0        |

|               |              |                    |           |             |           |              |                    |          |          |
|---------------|--------------|--------------------|-----------|-------------|-----------|--------------|--------------------|----------|----------|
| 2810025M15Rik | BC055845     | Biological process | -15.02247 | 0           | Igk-V5    | AK036494     | Biological process | 226.8212 | 0        |
| 2810403A07Rik | NM_028814    | Biological process | 13.20499  | 0           | Igl-V1    | AF290571     | Biological process | 374.3439 | 0        |
| 2810455F06Rik | NM_177268    | Biological process | 19.65001  | 0           | Iivb1     | NM_173751    | Biological process | 14.80167 | 0.000266 |
| 2900016B01Rik | NM_029116    | Biological process | -32.99736 | 0           | Isg2012   | NM_177663    | Biological process | -14.6295 | 0        |
| 2900062L11Rik | NM_029823    | Biological process | 13.07155  | 0           | Itprip    | NM_027559    | Biological process | 16.67409 | 0        |
| 3110040M04Rik | AK014162     | Biological process | -50.62803 | 0           | Kene11    | NM_021487    | Biological process | -29.5313 | 0.029915 |
| 3110049J23Rik | NM_026085    | Biological process | 26.88698  | 0           | Kctd9     | NM_134073    | Biological process | -16.1436 | 0        |
| 3110099E03Rik | AK085300     | Biological process | -19.72748 | 0.03418804  | Kdelr3    | NM_134090    | Biological process | -20.8355 | 0.21688  |
| 3321401G04Rik | NM_029930    | Biological process | -17.05751 | 0.01668824  | Ldoc11    | NM_177630    | Biological process | -15.981  | 0        |
| 3632451O06Rik | NM_026142    | Biological process | -16.06631 | 0           | Limch1    | NM_001001980 | Biological process | 18.18798 | 0        |
| 4833408A19Rik | AK079024     | Biological process | -33.19052 | 0           | Lims2     | NM_144862    | Biological process | 28.85672 | 0        |
| 4833427B12Rik | NM_178856    | Biological process | -60.05292 | 0.007478632 | Lhfp12    | NM_172589    | Biological process | -18.9274 | 0        |
| 4930402H24Rik | NM_029432    | Biological process | 13.3399   | 0           | Lin54     | NM_172714    | Biological process | -14.1485 | 0        |
| 4930445K14Rik | BC037706     | Biological process | 13.6214   | 0           | LOC665506 | XM_977361    | Biological process | 43.04177 | 0        |
| 4930524N10Rik | BY715441     | Biological process | 16.14519  | 0.006410256 | Ly6f      | NM_008530    | Biological process | -14.3412 | 0.000228 |
| 4930550C14Rik | NM_029247    | Biological process | -16.78946 | 0           | Lrrc66    | NM_153568    | Biological process | 21.32035 | 0        |
| 4930579C24Rik | NM_029482    | Biological process | -17.09586 | 0           | Lsm4      | NM_015816    | Biological process | -13.7134 | 0        |
| 4931406C07Rik | NM_001199484 | Biological process | -13.47776 | 0           | Lztr1     | NM_025808    | Biological process | -21.0798 | 0        |
| 4931417G12Rik | NM_027633    | Biological process | -14.45115 | 0           | Med28     | NM_025895    | Biological process | -26.0304 | 0        |
| 4931426K16Rik | NM_027641    | Biological process | -17.73932 | 0           | Mfap4     | NM_029568    | Biological process | -28.2963 | 0.21688  |
| 4933412E12Rik | AK016788     | Biological process | 16.31104  | 0           | Mfap5     | NM_015776    | Biological process | -19.5191 | 0.36218  |
| 4933427D14Rik | NM_028963    | Biological process | 21.88804  | 0           | Mfsd7a    | NM_172883    | Biological process | 13.21646 | 0        |
| 4933428G09Rik | NM_025755    | Biological process | -14.79742 | 0.008547009 | Mpv171    | NM_033564    | Biological process | -25.1092 | 0        |
| 4933437K13Rik | NM_028964    | Biological process | 41.14862  | 0           | Mrp152    | NM_026851    | Biological process | -26.1321 | 0        |
| 4933439C20Rik | AK162734     | Biological process | 15.54885  | 0.0142473   | Mrp154    | NM_025317    | Biological process | -14.5899 | 0        |
| 5031439G07Rik | NM_001033273 | Biological process | -14.31245 | 0           | Mrps18a   | NM_026768    | Biological process | -15.1914 | 0        |

|               |              |                    |           |            |          |              |                    |          |          |
|---------------|--------------|--------------------|-----------|------------|----------|--------------|--------------------|----------|----------|
| 5033411D12Rik | NM_138654    | Biological process | 29.28766  | 0          | Mrps21   | NM_078479    | Biological process | -16.875  | 0        |
| 5430434G16Rik | AK139147     | Biological process | 15.30595  | 0          | Myo15b   | XR_106391    | Biological process | -16.969  | 0        |
| 5730406M06Rik | NM_025669    | Biological process | 14.53958  | 0          | Narf     | NM_026272    | Biological process | -16.953  | 0        |
| 5730409K12Rik | XR_105990    | Biological process | 35.14519  | 0          | Ndufa12l | NM_001127346 | Biological process | -24.7187 | 0        |
| 5730494M16Rik | NM_001004361 | Biological process | -13.53179 | 0.05205137 | Ndufb5   | NM_025316    | Biological process | -19.9057 | 0        |
| 5730528L13Rik | NM_028137    | Biological process | -29.046   | 0.00534188 | Ndufc1   | NM_025523    | Biological process | -15.6343 | 0        |
| 5730593N15Rik | NM_175263    | Biological process | 29.73115  | 0          | Nola2    | NM_026631    | Biological process | -23.1544 | 0.010869 |
| 5830406C17Rik | NM_029508    | Biological process | 16.42609  | 0          | Notum    | NM_175263    | Biological process | 16.23046 | 0        |
| 6330405H19    | AK165889     | Biological process | 28.64615  | 0          | Nrm      | NM_134122    | Biological process | -51.9536 | 0        |
| 6430511F03    | NM_001163610 | Biological process | 15.33238  | 0          | Nt5dc2   | NM_027289    | Biological process | -19.0716 | 0        |
| 8430408G22Rik | NM_145980    | Biological process | 124.8389  | 0          | Nudt8    | NM_025529    | Biological process | -26.1359 | 0        |
| 9130204K15Rik | AK078931     | Biological process | -14.6316  | 0          | Nup210   | NM_018815    | Biological process | -19.423  | 0        |
| 9430052C07Rik | BQ945265     | Biological process | -14.49644 | 0          | Nus1     | NM_030250    | Biological process | -23.8521 | 0        |
| 9830002I17Rik | NM_029932    | Biological process | 46.95831  | 0          | Ociad2   | NM_026950    | Biological process | 27.26688 | 0        |
| 9930031P18Rik | AK079445     | Biological process | 13.55618  | 0          | Oip5     | NM_001042653 | Biological process | -24.1901 | 0.72907  |
| A130010C12Rik | AK037356     | Biological process | 23.35464  | 0          | Olfm4    | NM_001030294 | Biological process | -16.674  | 0        |
| A130038J17Rik | AK037696     | Biological process | 34.30087  | 0          | Ostf1    | NM_017375    | Biological process | -13.3296 | 0        |
| A130082M07Rik | AK038154     | Biological process | 17.73857  | 0          | Parp3    | NM_145619    | Biological process | -13.562  | 0.005342 |
| A330017A19Rik | XR_105845    | Biological process | 15.49185  | 0          | Pdzd11   | NM_028303    | Biological process | -13.9162 | 0        |
| AA415398      | NM_001004178 | Biological process | 23.92108  | 0          | Peg13    | AY151252     | Biological process | 13.24409 | 0        |
| AA467197      | NM_001004174 | Biological process | 15.56708  | 0          | Phf7     | NM_027949    | Biological process | 21.08285 | 0        |
| Abca8a        | NM_153145    | Biological process | 26.86917  | 0          | Plekha6  | NM_182930    | Biological process | 13.32253 | 0        |
| Abhd1         | NM_021304    | Biological process | 210.8899  | 0          | Plekha8  | NM_001164361 | Biological process | -34.3941 | 0        |
| Acaa1b        | NM_146230    | Biological process | 24.79694  | 0          | Ppil1    | NM_026845    | Biological process | 26.64953 | 0        |
| Acp6          | NM_019800    | Biological process | -16.42099 | 0          | Ppmr     | X65588       | Biological process | 13.68874 | 0        |
| Aasm2         | NM_146197    | Biological process | -20.00204 | 0          | Prkcdpb  | NM_028444    | Biological process | -14.5715 | 0        |

|               |              |                    |           |             |         |              |                    |          |          |
|---------------|--------------|--------------------|-----------|-------------|---------|--------------|--------------------|----------|----------|
| Adhb          | AK142824     | Biological process | -19.29189 | 0.659188    | Prodh2  | NM_019546    | Biological process | 36.10522 | 0        |
| Afap111       | NM_178928    | Biological process | -30.37736 | 0           | Prr15   | NM_030024    | Biological process | -20.2209 | 0        |
| Agxt211       | NM_027907    | Biological process | 24.39673  | 0           | Pxmp4   | NM_021534    | Biological process | -22.2665 | 0        |
| AI324046      | AI324046     | Biological process | 244.0379  | 0.00026605  | Rab711  | NM_144875    | Biological process | -17.5885 | 0        |
| AI427122      | NM_001033210 | Biological process | -14.06748 | 0           | Raly1   | NM_178631    | Biological process | 19.71551 | 0.001068 |
| AI448196      | NM_001202500 | Biological process | -22.93309 | 0.008547009 | Rassf3  | NM_138956    | Biological process | 15.06312 | 0        |
| AI607873      | NM_001204910 | Biological process | 69.37775  | 0           | Rassf4  | NM_178045    | Biological process | 16.12972 | 0.002188 |
| AI747699      | NM_001013770 | Biological process | -25.86747 | 0           | Rbm47   | NM_178446    | Biological process | -51.7839 | 0.009011 |
| Akap8l        | NM_017476    | Biological process | 13.15244  | 0           | Retnlg  | NM_181596    | Biological process | 39.59544 | 0        |
| Akirin1       | NM_023423    | Biological process | -17.54078 | 0           | Rmnd5b  | NM_025346    | Biological process | -16.3242 | 0.000228 |
| Als2cr4       | NM_001033449 | Biological process | -18.63046 | 0.000340094 | Rnase4  | NM_201239    | Biological process | 34.99548 | 0        |
| Amotl2        | NM_019764    | Biological process | 17.44737  | 0           | Rnfl14  | NM_030743    | Biological process | 23.96171 | 0        |
| Ang           | NM_201239    | Biological process | 39.72548  | 0           | Rnfl83  | NM_153504    | Biological process | 15.9281  | 0        |
| Angptl7       | NM_001039554 | Biological process | -15.41774 | 0           | Rnfl86  | NM_025786    | Biological process | 21.52164 | 0        |
| Ankrd37       | NM_001039562 | Biological process | -13.39932 | 0.1474359   | Rprd11b | NM_027434    | Biological process | -16.5886 | 0        |
| Ankrd56       | NM_175270    | Biological process | 26.34032  | 0           | Rrp12   | NM_199447    | Biological process | -15.9967 | 0        |
| Art4          | NM_026639    | Biological process | 19.85931  | 0           | Samd9l  | NM_010156    | Biological process | -19.1844 | 0        |
| AU022508      | NM_133791    | Biological process | 13.56999  | 0           | Sdf211  | NM_022324    | Biological process | -14.6896 | 0        |
| AW124722      | AW124722     | Biological process | 36.04227  | 0           | Sec14l3 | NM_001029937 | Biological process | -39.9883 | 0.004936 |
| B130019G13Rik | NM_001033312 | Biological process | -13.47504 | 0           | Sectm1b | NM_026907    | Biological process | 17.69743 | 0        |
| B230322F03Rik | AK045908     | Biological process | 15.55134  | 0           | Slc46a3 | NM_027872    | Biological process | 16.41096 | 0        |
| B230339H12Rik | NM_172282    | Biological process | -15.33886 | 0           | Smpd13b | NM_133888    | Biological process | 16.11299 | 0        |
| B230342M21Rik | NM_133898    | Biological process | 20.33934  | 0           | Shhg11  | NM_175692    | Biological process | 19.7443  | 0        |
| B930041F14Rik | NM_178699    | Biological process | 34.58308  | 0           | Snx21   | NM_133924    | Biological process | 14.17439 | 2.05E-05 |
| BC003324      | BC003324     | Biological process | -15.84271 | 0           | Snx7    | NM_029655    | Biological process | -33.6819 | 0        |
| BC008150      | BC008150     | Biological process | 20.22752  | 0           | Spatat6 | NM_026470    | Biological process | -18.2212 | 0        |



|               |              |                    |           |             |           |              |                    |          |          |
|---------------|--------------|--------------------|-----------|-------------|-----------|--------------|--------------------|----------|----------|
| BC013529      | BC013529     | Biological process | -15.12104 | 0           | Spc24     | NM_026282    | Biological process | -14.8279 | 2.80E-05 |
| BC014795      | BC014795     | Biological process | -19.59739 | 0           | Spns1     | NM_023712    | Biological process | -16.808  | 0        |
| BC016495      | BC016495     | Biological process | -35.29659 | 0           | Ssr2      | NM_025448    | Biological process | -16.7915 | 0        |
| BC017612      | BC017612     | Biological process | 13.03029  | 0           | Stbd1     | NM_175096    | Biological process | -13.5439 | 0        |
| BC018371      | BC018371     | Biological process | -16.77128 | 0.01602564  | Stk32a    | NM_178749    | Biological process | 15.06824 | 0.000252 |
| BC021785      | BC021785     | Biological process | 19.9457   | 0           | Svopl     | NM_177200    | Biological process | 23.76056 | 5.14E-06 |
| BC032203      | BC032203     | Biological process | 17.12109  | 0           | Tacstd2   | NM_020047    | Biological process | -16.2128 | 0        |
| BC034507      | BC034507     | Biological process | -14.64119 | 0.00534188  | Tbc1d10a  | NM_134023    | Biological process | 19.12517 | 0        |
| BC043944      | BC043944     | Biological process | 17.85679  | 0           | Tchh11    | NM_027762    | Biological process | -17.8138 | 0        |
| BC085271      | BC085271     | Biological process | -14.60567 | 0           | Tmc4      | NM_181820    | Biological process | 14.29195 | 0        |
| Bcas2         | NM_026602    | Biological process | -23.59542 | 0           | Tmem100   | NM_026433    | Biological process | 13.97692 | 0        |
| Bhlhb9        | NM_198161    | Biological process | -27.77673 | 0           | Tmem169   | NM_175564    | Biological process | -75.5541 | 0        |
| Bxdc1         | NM_023323    | Biological process | -17.3447  | 0.00011186  | Tmem16j   | NM_178381    | Biological process | -13.7019 | 0.005342 |
| Bzap1         | NM_172449    | Biological process | 15.04527  | 0           | Tmem29    | NM_001164683 | Biological process | -14.4338 | 0        |
| C030032G2IRik | BI650552     | Biological process | 26.05196  | 0           | Tmem56    | NM_178936    | Biological process | 13.70409 | 0        |
| C1qtmf3       | NM_030888    | Biological process | -31.27738 | 0           | Tmem86a   | NM_026436    | Biological process | -24.1271 | 0        |
| C230078M08Rik | BC150866     | Biological process | -14.48003 | 0           | Tmigd1    | NM_025655    | Biological process | -13.7528 | 0.004274 |
| Creb12        | NM_177687    | Biological process | 14.03311  | 0           | Trappc1   | NM_001024206 | Biological process | -16.6954 | 0        |
| C4a           | NM_011413    | biological process | -13.98016 | 0.003739667 | Trim47    | NM_172570    | Biological process | -27.624  | 0        |
| C730025P13Rik | NM_177344    | Biological process | -22.78876 | 0           | Trim7     | NM_053166    | Biological process | 17.90689 | 0        |
| C77604        | NM_001008705 | Biological process | -15.16954 | 0           | Troap     | NM_030159    | Biological process | -23.6183 | 0.240385 |
| C85492        | NM_153540    | Biological process | 17.17782  | 0           | Trp53imp2 | NM_178111    | Biological process | -18.938  | 0        |
| Ccdc28b       | NM_025455    | Biological process | -21.45357 | 0.02017271  | Tyms-ps   | M30774       | Biological process | -18.1945 | 0        |
| Ccdc6         | NM_001111121 | Biological process | -33.98211 | 0           | Uap111    | NM_001033293 | Biological process | -34.472  | 0        |
| Creld2        | NM_029720    | Biological process | -15.91821 | 0           | Ugt1a7c   | NM_145079    | Biological process | 200.6048 | 0        |
| Ccl21c        | NM_023052    | Biological process | 33.97845  | 0           | Vasn      | NM_139307    | Biological process | 14.66453 | 0        |

|               |           |                    |           |            |               |              |                                          |           |          |
|---------------|-----------|--------------------|-----------|------------|---------------|--------------|------------------------------------------|-----------|----------|
| Cdca2         | NM_175384 | Biological process | -69.17947 | 0.05662393 | Xlr4a         | NM_021365    | Biological process                       | 20.49694  | 2.80E-05 |
| Cdca3         | NM_013538 | Biological process | -56.04836 | 0.03205642 | Xpnp2         | NM_133213    | Biological process                       | -21.0864  | 0        |
| Cenpi         | NM_145924 | Biological process | -19.34624 | 0.5961539  | Zfp282        | NM_146175    | Biological process                       | -16.8664  | 0        |
| Cenpl         | NM_027429 | Biological process | -44.06356 | 0          | Zfp533        | NM_178723    | Biological process                       | 35.18403  | 0        |
| Cenpm         | NM_025639 | biological process | -22.00993 | 0.392827   | Zfp579        | NM_026741    | Biological process                       | 13.62199  | 0        |
| Cenpn         | NM_028131 | Biological process | -17.71201 | 0.03739316 | Zfp68         | NM_013844    | Biological process                       | 35.97963  | 0.005342 |
| Cenpp         | NM_025495 | Biological process | -22.14549 | 0.03739316 | Zfp810        | NM_145612    | Biological process                       | -19.7563  | 0        |
| Cenpt         | NM_177150 | Biological process | -23.693   | 0          | Col4a1        | NM_009931    | cellular response to amino acid stimulus | -89.8031  | 0.00641  |
| Chchd7        | NM_181391 | Biological process | -15.09117 | 0          | Dpp7          | NM_031843    | proteolysis                              | -14.8673  | 0.110993 |
| Chd9          | NM_177224 | Biological process | 13.00764  | 0.00068403 | Ifit3         | NM_010501    | cellular response to interferon-alpha    | 18.87765  | 0.000228 |
| Citm3         | NM_178669 | Biological process | -14.30297 | 0          | Rnase1        | NM_011271    | endonuclease activity                    | 56.32358  | 0        |
| Cntm6         | NM_026036 | Biological process | -35.90944 | 0          | Serpina3n     | NM_009252    | response to cytokine stimulus            | 15.44321  | 0        |
| Cnih4         | NM_030131 | Biological process | -14.50795 | 0          | 2700094K13Rik | NM_001033166 | cell redox homeostasis                   | -53.6904  | 0        |
| Col27a1       | NM_025685 | Biological process | 15.58485  | 2.05E-05   | Csprs         | NM_033616    | Biological process                       | 13.45273  | 0        |
| Cox7a2        | NM_009945 | Biological process | -13.86336 | 0          | Cyp2d12       | NM_201360    | Biological process                       | 137.4507  | 0        |
| Cpm           | NM_027468 | Biological process | 13.49046  | 0          | Cyp4a31       | NM_201640    | Biological process                       | 30.24836  | 0        |
| D15Ert682e    | NM_028003 | Biological process | -19.7373  | 0          | Defb19        | NM_145157    | Biological process                       | -30.36063 | 0        |
| D630023F18Rik | NM_175293 | Biological process | -28.20999 | 0          | Dleu2         | AK140953     | Biological process                       | 47.19983  | 0        |
| D630029K05Rik | AK085456  | Biological process | 36.12284  | 0          | Dhrs7         | NM_025522    | Biological process                       | 21.79137  | 0.324786 |
| D6Mit97       | BF785914  | Biological process | 374.3439  | 0          | Dnajc12       | NM_013888    | Biological process                       | 17.47228  | 0        |
| D930048N14Rik | BC075670  | Biological process | 25.93578  | 0          | Dnajc13       | NM_001163026 | Biological process                       | 22.98237  | 0        |
| Deakd         | NM_026551 | Biological process | -16.45015 | 0          | Drcnmb1a      | NM_053090    | Biological process                       | -13.51308 | 0        |
| Dcun1d5       | NM_029775 | Biological process | -18.30021 | 0          | Ddit4l        | NM_030143    | Biological process                       | -21.26032 | 0.008547 |
| Odc1          | NM_013614 | kidney development | -45.3672  | 0          |               |              |                                          | 0         | 0        |

| <b>translation</b>          |           |                                      |          |         |           |           |                                 |          |          |
|-----------------------------|-----------|--------------------------------------|----------|---------|-----------|-----------|---------------------------------|----------|----------|
| 2810423O19Rik               | NM_198931 | protein dephosphorylation            | 18.84997 | 0       | Map3k6    | NM_016693 | phosphorylation                 | 29.47405 | 0        |
| 9430080K19Rik               | NM_008696 | protein phosphorylation              | -25.4938 | 0       | Pbk       | NM_023209 | peptidyl-serine phosphorylation | -98.573  | 0.005342 |
| Camk2n2                     | NM_028420 | phosphorylation                      | 14.76745 | 0       | Pip5k1b   | NM_008846 | phosphorylation                 | -13.1792 | 0        |
| Eef2                        | NM_007907 | translation                          | 43.14189 | 0       | Plk3      | NM_013807 | phosphorylation                 | 30.00504 | 0        |
| Eif4b                       | NM_145625 | translation                          | 15.43015 | 0.00393 | Pomt2     | NM_153415 | protein O-linked glycosylation  | -16.5341 | 0        |
| Eif4e13                     | NM_023314 | translation                          | -24.3173 | 0       | Rpl22     | NM_009079 | translation                     | 31.34038 | 0        |
| Ar1l                        | NM_025859 | Golgi organization                   | -17.4517 | 0       | Stk32b    | NM_022416 | phosphorylation                 | 14.08118 | 0        |
| Erp29                       | NM_026129 | protein secretion                    | -24.1862 | 0       | Serpina1b | NM_009243 | protein N-linked glycosylation  | 79.56782 | 0        |
| Fbxo25                      | NM_025785 | protein ubiquitination               | -17.6475 | 0       | Serpina1d | NM_009246 | protein N-linked glycosylation  | 62.17025 | 0        |
| Galnt1                      | NM_013814 | protein O-linked glycosylation       | -17.7672 | 0.00026 | Tesk1     | NM_011571 | protein phosphorylation         | -13.918  | 0        |
| Lgals4                      | NM_010706 | protein binding                      | 29.45535 | 0       |           |           |                                 |          |          |
| <b>cell differentiation</b> |           |                                      |          |         |           |           |                                 |          |          |
| Cebpa                       | NM_007678 | brown fat differentiation            | 16.27397 | 0       | Ndr2      | NM_013864 | cell differentiation            | 23.91835 | 0        |
| Corin                       | NM_016869 | neuron differentiation               | -33.202  | 0       | Neurog2   | NM_009718 | cell differentiation            | 42.48978 | 0.006781 |
| D0H4S114                    | NM_053078 | regulation of neuron differentiation | -78.947  | 0       | Ngef      | NM_019867 | cell differentiation            | 17.36056 | 0        |
| Ggnbp1                      | NM_027544 | cell differentiation                 | 30.79735 | 0.00741 | Osr2      | NM_054049 | cell differentiation            | -40.1019 | 0        |
| Hspg2                       | NM_008305 | chondrocyte differentiation          | -19.2076 | 0.08540 | Rps3a     | NM_016959 | cell differentiation            | -17.2009 | 0        |
| Lhx1                        | NM_008498 | cell differentiation                 | 16.29161 | 0       | Lrg1      | NM_029796 | brown fat cell differentiation  | 17.11863 | 0        |
| Tmem176b                    | NM_023056 | cell differentiation                 | -16.3732 | 0       | Zfp35     | NM_011755 | cell differentiation            | -45.3949 | 0        |

**cell cycle**

|               |           |                                              |           |            |           |              |                                       |          |          |
|---------------|-----------|----------------------------------------------|-----------|------------|-----------|--------------|---------------------------------------|----------|----------|
| 2310036D04Rik | NM_172134 | cell proliferation                           | 51.6045   | 0          | Gadd45a   | NM_007836    | cell cycle                            | -20.1331 | 0        |
| 2410004L22Rik | NM_029621 | cell cycle                                   | -18.4405  | 0.034188   | Gsg2      | NM_010353    | cell cycle                            | -14.4744 | 0        |
| 3000004C01Rik | NM_197959 | cell cycle                                   | -27.3561  | 0.206717   | H2afx     | NM_010436    | cell cycle                            | -41.5763 | 0        |
| 3110013H01Rik | NM_028448 | cell cycle                                   | 17.46578  | 0          | Hist1h2bh | NM_178197    | nucleosome assembly                   | 13.90894 | 0        |
| 583041I120    | NM_009873 | cell cycle                                   | -13.8899  | 0          | Hist2h2ab | NM_178213    | nucleosome assembly                   | -47.0121 | 0.534188 |
| 8030404L10Rik | NM_029633 | cell cycle                                   | 14.64067  | 0          | Hist2h2ac | NM_175662    | nucleosome assembly                   | -37.5296 | 0        |
| App12         | NM_145220 | cell cycle                                   | 13.53945  | 0          | Hist2h2be | NM_178214    | nucleosome assembly                   | -35.8407 | 0.00137  |
| Arpp19        | NM_021548 | cell cycle                                   | -18.7416  | 0          | Id3       | NM_008321    | regulation of cell cycle              | 17.92796 | 0        |
| Aurka         | NM_011497 | cell cycle                                   | -67.6762  | 0.069444   | Idb4      | NM_031166    | G1/S transition of mitotic cell cycle | 14.88236 | 0        |
| Aurkb         | NM_011496 | cell cycle                                   | -51.6149  | 0.05235    | Incnp     | NM_016692    | cell cycle                            | -43.3679 | 0.029915 |
| Bub1b         | NM_009773 | cell cycle                                   | -27.68126 | 0.01216533 | Kif11     | NM_010615    | cell cycle                            | -41.8867 | 0.185897 |
| Brn1          | NM_144818 | cell cycle                                   | -31.7441  | 0.041667   | Kif20b    | NM_183046    | cell cycle                            | -123.719 | 0.021368 |
| C030025P15Rik | NM_007708 | G2/M transition of mitotic cell cycle        | -13.6021  | 3.65E-05   | Kif2c     | NM_134471    | cell cycle                            | -17.8288 | 0.253205 |
| Ccdc5         | NM_146089 | cell cycle                                   | -21.2509  | 0          | Knsl5     | NM_024245    | cell cycle cytokinesis                | -45.6772 | 0        |
| Ccdc99        | NM_027411 | cell cycle                                   | -30.7973  | 0.199786   | KIF23     | NM_024245    | cell cycle cytokinesis                | -23.2248 | 0.082694 |
| Ccnb1         | NM_172301 | cell cycle                                   | -85.6847  | 0.824839   | Kntc1     | NM_001042421 | cell cycle                            | -41.8437 | 0.077991 |
| Cone2         | NM_009830 | cell cycle                                   | -16.37    | 0.344017   | Mad2l1    | NM_019499    | cell cycle                            | -47.7398 | 0.022149 |
| Cenpa         | NM_007681 | establishment of mitotic spindle orientation | -106.28   | 0          | Mapk13    | NM_011950    | cell cycle                            | -26.4613 | 0        |
| Cdc20         | NM_023223 | cell cycle                                   | -101.603  | 0.000593   | Mcm2      | NM_008564    | cell cycle                            | -28.8593 | 0        |
| Cdca5         | NM_026410 | cell cycle                                   | -27.5849  | 0.047009   | Mcm5      | NM_008566    | cell cycle                            | -87.7255 | 0        |
| Cdca8         | NM_026560 | cell cycle                                   | -74.2616  | 0.010401   | Mcm6      | NM_008567    | cell cycle                            | -35.5179 | 0.040331 |
| Cdc2a         | NM_007659 | cell cycle                                   | -32.6364  | 0.038237   | Mcm3      | NM_008563    | cell cycle                            | -26.4047 | 0.200855 |

|                     |           |                                                     |          |          |               |              |                                            |          |          |
|---------------------|-----------|-----------------------------------------------------|----------|----------|---------------|--------------|--------------------------------------------|----------|----------|
| Cdkn3               | NM_028222 | cell cycle                                          | -50.8193 | 0.145546 | Mll5          | NM_026984    | cell cycle                                 | -15.443  | 0        |
| Cdt1                | NM_026014 | cell cycle                                          | -36.4028 | 0        | Nasp          | NM_016777    | cell cycle                                 | -16.6459 | 0.021085 |
| Chaf1a              | NM_013733 | cell cycle                                          | -40.645  | 0.005342 | Ncapd2        | NM_146171    | cell cycle                                 | -15.7145 | 0.006055 |
| Chaf1b              | NM_028083 | cell cycle                                          | -56.7691 | 0.021368 | Ncaph         | NM_144818    | cell cycle                                 | -75.7788 | 0.018162 |
| Clspn               | NM_175554 | cell cycle                                          | -16.2008 | 0.013507 | Plkl1         | NM_011121    | cell cycle                                 | -88.097  | 0.008547 |
| Crip2               | NM_024223 | positive regulation of cell proliferation           | -14.588  | 0        | Plk2          | NM_152804    | mitotic cell cycle                         | -20.5194 | 0.005342 |
| D930046M13Rik       | NM_177354 | cell cycle                                          | -18.1144 | 0.122863 | Prok1         | NM_001044382 | positive regulation of cell division       | -15.9922 | 0.317611 |
| Dbf4                | NM_013726 | cell cycle                                          | -35.8938 | 0.004274 | Rcc1          | NM_133878    | cell cycle                                 | -16.6287 | 0        |
| Dusp1               | NM_013642 | cell cycle                                          | 41.13778 | 0        | Sass6         | NM_028349    | cell cycle                                 | -15.378  | 0.125    |
| Dync1li1            | NM_146229 | cell cycle                                          | -14.1888 | 0        | Sesn2         | NM_144907    | cell cycle arrest                          | 63.87074 | 0        |
| Dynlt3              | NM_025975 | cell cycle                                          | -27.8052 | 0        | Sgol2         | NM_199007    | cell cycle                                 | -56.1981 | 0.443376 |
| E4f1                | NM_007893 | cell cycle                                          | 13.10419 | 0        | Snflk         | NM_010831    | cell cycle                                 | 15.39599 | 0        |
| Esco2               | NM_028039 | cell cycle                                          | -92.0228 | 0.149573 | Spc25         | NM_025565    | cell cycle                                 | -29.7315 | 0        |
| Fam107a             | NM_183187 | regulation of cell growth                           | 50.40599 | 0        | Txnip         | NM_023719    | cell cycle                                 | 24.80585 | 0        |
| F630043A04Rik       | NM_198605 | cell cycle                                          | -22.4798 | 0.755342 | Zwint         | NM_025635    | cell cycle                                 | -15.672  | 0        |
| Gadd45g             | NM_011817 | regulation of cell cycle                            | 20.54953 | 0        | Cdca7         | NM_025866    | cell division                              | -32.8327 | 0.087607 |
| <b>tanscription</b> |           |                                                     |          |          |               |              |                                            |          |          |
| Hoxa5               | NM_010453 | transcription, DNA-dependent                        | 17.73564 | 0        | Zfp191        | NM_021559    | regulation of transcription, DNA-dependent | 25.02455 | 0        |
| Hoxc9               | NM_008272 | transcription, DNA-dependent                        | 15.45063 | 0        | 1110004P21Rik | NM_023603    | regulation of transcription, DNA-dependent | 25.11979 | 0        |
| Idb2                | NM_010496 | negative regulation of transcription, DNA-dependent | 14.97894 | 0        | Kctd1         | NM_134112    | regulation of transcription, DNA-dependent | -16.7143 | 0        |

|               |              |                                                                      |          |          |               |           |                                                     |          |          |
|---------------|--------------|----------------------------------------------------------------------|----------|----------|---------------|-----------|-----------------------------------------------------|----------|----------|
| Nfkbia        | NM_010907    | positive regulation of transcription, DNA-dependent                  | 15.13402 | 0.016688 | Klf1          | NM_010635 | positive regulation of transcription, DNA-dependent | 19.76525 | 0        |
| Bcl6b         | NM_007528    | negative regulation of transcription from RNA polymerase II promoter | -29.9219 | 0.016026 | Dnajb6        | NM_011847 | negative regulation of transcription, DNA-dependent | 19.8432  | 0        |
| Cbx7          | NM_144811    | regulation of transcription, DNA-dependent                           | 41.24406 | 0        | Meox1         | NM_010791 | regulation of transcription, DNA-dependent          | -21.6323 | 0        |
| C130020C13Rik | NM_175231    | regulation of transcription, DNA-dependent                           | -14.5069 | 0        | Myst2         | NM_177619 | regulation of transcription, DNA-dependent          | -15.4778 | 0        |
| Col4a2        | NM_009932    | transcription, DNA-dependent                                         | -74.2871 | 0        | Mbnl2         | NM_175341 | RNA splicing                                        | -16.0521 | 0        |
| Med21         | NM_025315    | regulation of transcription, DNA-dependent                           | -26.8955 | 0        | Ndn           | NM_010882 | transcription, DNA-dependent                        | -30.333  | 0        |
| Dnajb11       | NM_026400    | mRNA modification                                                    | -22.9017 | 0        | Apitd1        | NM_027263 | transcription initiation, DNA-dependent             | -19.3198 | 0.014957 |
| D12Wsu95e     | NM_198023    | regulation of transcription, DNA-dependent                           | -23.3615 | 0        | Nfx1          | NM_023739 | regulation of transcription, DNA-dependent          | 15.41298 | 0        |
| Dscr6         | NM_133229    | negative regulation of transcription from RNA polymerase II promoter | -13.1011 | 0        | Trps1         | NM_032000 | negative regulation of transcription, DNA-dependent | -28.6263 | 0        |
| 1810073H04Rik | NM_001081074 | mRNA processing                                                      | -15.1651 | 0        | 4632419I22Rik | NM_027421 | snRNA processing                                    | -15.9037 | 0.016026 |
| Fbp3          | NM_001033389 | positive regulation of transcription, DNA-dependent                  | -15.9139 | 0        | Pou2af1       | NM_011136 | regulation of transcription, DNA-dependent          | 66.75111 | 0        |
| Foxm1         | NM_008021    | regulation of transcription, DNA-dependent                           | -25.0275 | 0.002717 | Rbm35a        | NM_194055 | mRNA processing                                     | 38.94757 | 0        |
| Foxq1         | NM_008239    | regulation of transcription, DNA-dependent                           | 27.64632 | 0        | Snai2         | NM_011415 | regulation of transcription, DNA-dependent          | -14.2763 | 0.001068 |

|                  |              |                                                                            |          |          |         |           |                                                                            |          |          |
|------------------|--------------|----------------------------------------------------------------------------|----------|----------|---------|-----------|----------------------------------------------------------------------------|----------|----------|
| Hdac11           | NM_144919    | regulation of transcription,<br>DNA-dependent                              | 23.28886 | 0        | Tbx10   | NM_011533 | regulation of transcription,<br>DNA-dependent                              | -121.12  | 0        |
| Hic2             | NM_178922    | regulation of transcription,<br>DNA-dependent                              | 14.22406 | 0        | Tbx13   | NM_011533 | regulation of transcription,<br>DNA-dependent                              | -48.2394 | 0.128205 |
| Hist2h3b         | NM_178215    | regulation of gene silencing                                               | -23.0697 | 0        | Phf10   | NM_024250 | transcription, DNA-dependent                                               | -24.0347 | 0        |
| Hist1h3a         | NM_013550    | regulation of gene silencing                                               | -16.9043 | 0.383547 | Tut1    | NM_197993 | mRNA processing                                                            | 19.05613 | 0        |
| Hmgb2            | BI655593     | negative regulation of<br>transcription,<br>DNA-dependent                  | -22.2317 | 0        | Tsc22d3 | NM_010286 | regulation of transcription,<br>DNA-dependent                              | 54.82657 | 0        |
| Hmgn3            | NM_026122    | positive regulation of<br>transcription from RNA<br>polymerase II promoter | -16.3502 | 0        | Tdg     | NM_172552 | negative regulation of<br>transcription from RNA<br>polymerase II promoter | -13.1788 | 0.208896 |
| Hnflb            | NM_009330    | transcription,<br>DNA-dependent                                            | -32.066  | 0        | Wtip    | NM_207212 | transcription, DNA-dependent                                               | 20.09834 | 0        |
| <b>transport</b> |              |                                                                            |          |          |         |           |                                                                            |          |          |
| Hbb-b1           | NM_016956    | oxygen transport                                                           | -13.0813 | 7.90E-09 | Slc13a3 | NM_054055 | transport                                                                  | 15.98298 | 0        |
| Hven1            | NM_028752    | transport                                                                  | -14.0487 | 0.058076 | Sv2a    | NM_022030 | transport                                                                  | -36.3054 | 0        |
| Kir4.2           | NM_019664    | transport                                                                  | 62.4084  | 0        | Sycn    | NM_026716 | exocytosis                                                                 | 95.5387  | 0        |
| Laptm5           | NM_010686    | transport                                                                  | 24.79488 | 0        | Syp     | NM_009305 | transport                                                                  | 23.23504 | 0        |
| Lman2l           | NM_001013374 | protein transport                                                          | -14.0152 | 0        | Syp12   | NM_008596 | transport                                                                  | -59.9993 | 0        |
| Mfsd2            | NM_029662    | transmembrane transport                                                    | -112.311 | 0        | Tfrc    | NM_011638 | endocytosis                                                                | -67.6119 | 0        |
| Mfsd7c           | NM_145447    | transmembrane transport                                                    | 27.75059 | 0        | Timm10  | NM_013899 | transport                                                                  | -18.8285 | 0        |
| Nup160           | NM_021512    | transport                                                                  | -111.162 | 0.095085 | Tmem48  | NM_028355 | transport                                                                  | -34.4614 | 0.003205 |
| Nup12            | NM_153092    | transport                                                                  | -13.7153 | 0        | Trpm6   | NM_153417 | transport                                                                  | 17.18743 | 0.00012  |
| Osta             | NM_145932    | transport                                                                  | -31.6714 | 0        | Ttyh3   | NM_175274 | transport                                                                  | -13.0907 | 0        |
| Pigr             | NM_011082    | transport vesicle                                                          | 136.4072 | 0        | Ucp1    | NM_009463 | transport                                                                  | 30.94071 | 0        |

|                          |              |                          |               |          |          |         |              |                       |          |          |
|--------------------------|--------------|--------------------------|---------------|----------|----------|---------|--------------|-----------------------|----------|----------|
| 0610009O04Rik            | NM_028746    | amino acid transport     | transmembrane | -17.954  | 0.016026 | Slc15a2 | NM_021301    | transport             | -13.5588 | 0        |
| 2310046K01Rik            | NM_027172    | transport                |               | -34.4349 | 0        | Slc22a2 | NM_013667    | transport             | -13.9243 | 0        |
| Abcc4                    | NM_001033336 | drug transport           | transmembrane | 70.03412 | 0        | Slc22a7 | NM_144856    | transport             | -48.7456 | 0        |
| Afm                      | NM_145146    | transport                |               | -19.0492 | 0.119658 | Slc22a8 | NM_031194    | transport             | 61.11576 | 0        |
| Apom                     | NM_018816    | lipid transport          |               | 73.07208 | 0        | Slc22a9 | NM_019723    | transport             | -29.559  | 0.042462 |
| Aqp1                     | NM_007472    | ammonium transport       |               | 13.77774 | 0        | Slc25a3 | NM_133668    | transport             | -14.7523 | 0        |
| Aqp4                     | NM_009700    | carbon dioxide transport |               | 43.52991 | 0.001427 | Slc26a4 | NM_011867    | transport             | 13.38967 | 0        |
| Catsper2                 | NM_153075    | calcium ion transport    | transmembrane | 18.54971 | 0        | Slc34a3 | NM_080854    | transport             | -16.2252 | 0        |
| Clenka                   | NM_024412    | chloride transport       |               | 20.93297 | 0        | Slc35b1 | NM_016752    | transport             | -21.6347 | 0        |
| Clic4                    | NM_013885    | transport                |               | -21.4792 | 0        | Slc41a2 | NM_177388    | transport             | -21.9756 | 0        |
| Clic1                    | NM_033444    | chloride transport       |               | -13.4448 | 0        | Slc5a6  | NM_177870    | transport             | -48.4167 | 0        |
| Cp                       | NM_007752    | copper ion transport     |               | 17.04005 | 0.008349 | Slc6a12 | NM_133661    | transport             | 14.14436 | 0        |
| D330038K10Rik            | NM_173028    | transport                |               | -26.1597 | 0.384684 | Slc6a18 | NM_001040692 | transport             | 16.59364 | 0        |
| Fabp3                    | NM_010174    | transport                |               | -23.3842 | 0        | Slco2b1 | NM_175316    | transport             | 21.94858 | 0        |
| Havr1                    | NM_134248    | phagocytosis, engulfment |               | -32.3456 | 0        | Stard5  | NM_023377    | transport             | 15.40509 | 0        |
| Rab3d                    | NM_031874    | transport                |               | 21.02452 | 0        | Vamp2   | NM_009497    | protein transport     | 14.02804 | 0        |
| Rbp1                     | NM_011254    | transport                |               | -42.1358 | 0        | Vamp3   | NM_009498    | protein transport     | -29.035  | 0        |
| Slc10a6                  | NM_029415    | transport                |               | 25.4842  | 0.000252 | Vps36   | NM_027338    | protein transport     | -26.5625 | 0        |
| Slc12a3                  | NM_019415    | transport                |               | 21.44701 | 5.38E-05 | Slc26a6 | NM_134420    | bicarbonate transport | -45.2886 | 0        |
| Sri                      | NM_025618    | Calcium ion transport    |               | -16.7724 | 0.002028 |         |              |                       |          |          |
| <b>metabolic process</b> |              |                          |               |          |          |         |              |                       |          |          |
| Dgkdl                    | NM_177646    | diacylglycerol process   | metabolic     | -35.5269 | 0        | Nt5e    | NM_011851    | AMP catabolic process | -42.3625 | 0        |



|               |              |                                     |          |          |         |           |                                                           |          |          |
|---------------|--------------|-------------------------------------|----------|----------|---------|-----------|-----------------------------------------------------------|----------|----------|
| 1190003J15Rik | NM_029821    | metabolic process                   | 52.01244 | 0        | Nf5c3   | NM_026004 | metabolic process                                         | -14.1477 | 0        |
| 1810014F10Rik | NM_026928    | fucose<br>process                   | -15.5213 | 0        | Shmt2   | NM_028230 | L-serine<br>biosynthetic<br>process                       | 13.19365 | 0        |
| 2410016F01Rik | NM_022423    | metabolic process                   | -13.3851 | 0        | Oplah   | NM_153122 | glutathione<br>metabolic<br>process                       | 15.12472 | 0        |
| 7330410H16Rik | NM_181315    | metabolic process                   | -16.8729 | 0        | Pde6d   | NM_008801 | metabolic process                                         | -13.0084 | 0.000359 |
| A4galt        | NM_001170954 | metabolic process                   | 16.97297 | 0        | Pdk3    | NM_145630 | carbohydrate<br>metabolic<br>process                      | -35.0831 | 0        |
| Aacs          | NM_030210    | fatty acid<br>metabolic<br>process  | -20.3332 | 0        | Pecr    | NM_023523 | metabolic process                                         | -21.2613 | 0        |
| Abcb1b        | NM_011075    | metabolic process                   | 57.6721  | 0        | Phgdh   | NM_016966 | metabolic process                                         | -18.3876 | 0        |
| Acaa1a        | NM_130864    | metabolic process                   | 13.60968 | 0        | Plec3   | NM_152813 | lipid metabolic process                                   | 17.76329 | 0        |
| Acaa2         | NM_177470    | metabolic process                   | 13.09163 | 0.000266 | Pnpla2  | NM_025802 | metabolic process                                         | 37.53623 | 0        |
| Acat3         | NM_153151    | metabolic process                   | 13.44101 | 0        | Pnpla7  | NM_146251 | lipid metabolic process                                   | 13.24166 | 0        |
| Acmsd         | NM_001033041 | metabolic process                   | -34.461  | 0        | Ppara   | NM_011144 | lipid metabolic process                                   | 37.89764 | 0        |
| Acot11        | NM_025590    | metabolic process                   | -16.2622 | 2.47E-06 | Proc    | NM_008934 | metabolic process                                         | 38.37151 | 0        |
| Acot3         | NM_134246    | metabolic process                   | 21.57422 | 0        | Psat1   | NM_177420 | metabolic process                                         | 19.73827 | 0        |
| Acs11         | NM_007981    | metabolic process                   | 49.04991 | 0        | Rad51c  | NM_053269 | DNA metabolic process                                     | -47.0828 | 0.000913 |
| Acm3          | NM_016870    | metabolic process                   | -40.5458 | 0.001653 | Rarres2 | NM_027852 | retinoid metabolic process                                | 41.5925  | 0        |
| Acss2         | NM_019811    | metabolic process                   | 16.28706 | 0        | Rev3l   | NM_011264 | nucleobase-containing<br>compound<br>metabolic<br>process | -13.7126 | 0        |
| Mccc1         | NM_023644    | metabolic process                   | -16.5403 | 0.017094 | Mmp2    | NM_008610 | metabolic process                                         | -69.0088 | 0        |
| Mdh2          | NM_008617    | NADH<br>metabolic<br>process        | -28.9855 | 0        | Hmgcs2  | NM_008256 | cholesterol<br>biosynthetic<br>process                    | 137.8433 | 0        |
| Mgam          | NM_001171003 | metabolic process                   | 18.11528 | 0        | Mocs1   | NM_028464 | metabolic process                                         | 24.91979 | 0        |
| Mgst1         | NM_019946    | glutathione<br>metabolic<br>process | 25.7503  | 0        | Naprt1  | NM_172607 | NAD biosynthetic process                                  | 15.13564 | 0        |

|          |              |                                  |          |          |          |              |                      |                      |          |          |
|----------|--------------|----------------------------------|----------|----------|----------|--------------|----------------------|----------------------|----------|----------|
| Adamts2  | NM_175643    | metabolic process                | -17.9824 | 0.003531 | Schip1   | NM_013928    | estrogen process     | metabolic            | -19.879  | 0        |
| Agx2     | NM_001031851 | metabolic process                | -15.138  | 0        | Sepp1    | NM_009155    | selenium compound    | metabolic process    | -15.6316 | 0        |
| Akr1b7   | NM_009731    | cellular lipid metabolic process | -19.9474 | 0        | Serpina6 | NM_007618    | glucocorticoid       | metabolic process    | -82.4484 | 0.48718  |
| Aldh1a1  | NM_013467    | metabolic process                | 17.13326 | 0.002137 | Slc27a1  | NM_011977    | metabolic process    | metabolic process    | 18.05086 | 0        |
| Aldh2    | NM_009656    | metabolic process                | 22.04252 | 0        | Soat1    | NM_009230    | lipid                | metabolic process    | -14.4668 | 0.001329 |
| Aldh3a1  | NM_007436    | cellular metabolic process       | 15.19247 | 0.00641  | St8sia1  | NM_011374    | lipid                | metabolic process    | -23.6356 | 0.148443 |
| Alg12    | NM_145477    | metabolic process                | -13.422  | 0        | Sult1a1  | NM_133670    | metabolic process    | metabolic process    | 13.41486 | 0        |
| Apob     | NM_009693    | cholesterol metabolic process    | 92.1614  | 0        | Tk1      | NM_009387    | thymidine            | metabolic process    | -19.9444 | 0.000905 |
| Arg2     | NM_009705    | arginine metabolic process       | -24.25   | 0.008547 | Tgm1     | NM_019984    | protein              | metabolic process    | -27.8261 | 0        |
| Atp6v1a  | NM_007508    | ATP metabolic process            | -14.4806 | 0        | Thg1l    | NM_001080969 | metabolic process    | metabolic process    | 61.03534 | 0        |
| AU014645 | NM_001033201 | RNA process                      | -14.4392 | 0        | Top2a    | NM_011623    | ATP                  | catabolic process    | -38.0146 | 0.37346  |
| Car13    | NM_024495    | one-carbon metabolic process     | -20.952  | 0.005342 | Ube2v1   | NM_023230    | metabolic process    | metabolic process    | 13.08269 | 0        |
| Car14    | NM_146104    | metabolic process                | 21.66726 | 0        | Ugp2     | NM_139297    | metabolic process    | metabolic process    | 23.0245  | 0        |
| Car3     | NM_007606    | one-carbon metabolic process     | 67.68891 | 0        | Upb1     | NM_133995    | metabolic process    | metabolic process    | 20.23326 | 0        |
| Hmgcr    | NM_008255    | cholesterol biosynthetic process | -29.847  | 0.04594  | Pdss1    | NM_019501    | isoprenoid           | isoprenoid           | -20.7671 | 0        |
| Mvd      | NM_138656    | cholesterol biosynthetic process | -19.3896 | 0        | Pigz     | NM_172822    | GPI anchor           | biosynthetic process | 98.01265 | 0        |
|          |              | biosynthetic process             |          |          |          |              | biosynthetic process | biosynthetic process |          |          |

|        |           |                                   |          |          |               |           |                                                                 |          |          |
|--------|-----------|-----------------------------------|----------|----------|---------------|-----------|-----------------------------------------------------------------|----------|----------|
| Car9   | NM_139305 | one-carbon<br>process             | 25.12955 | 1.03E-05 | 1500015O10Rik | NM_024283 | cyclin catabolic process                                        | -24.4898 | 0.098291 |
| Cidea  | NM_007702 | lipid metabolic process           | 73.7076  | 0        | 2410015N17Rik | NM_023203 | nucleoside triphosphate<br>catabolic process                    | -20.8657 | 0        |
| Chst3  | NM_016803 | carbohydrate metabolic<br>process | -18.6522 | 0        | 2610207P08Rik | NM_026001 | RNA catabolic process                                           | -21.2691 | 0        |
| Chst7  | NM_021715 | carbohydrate metabolic<br>process | -20.5578 | 0        | Abcc6         | NM_018795 | ATP catabolic process                                           | 14.28068 | 0        |
| Cml4   | NM_023455 | metabolic process                 | 14.26884 | 0        | Ar14a         | NM_007487 | GTP catabolic process                                           | 14.26012 | 0.103672 |
| Cndp1  | NM_177450 | metabolic process                 | 49.97351 | 0        | Atp10d        | NM_153389 | ATP catabolic process                                           | -17.415  | 0        |
| Cndp2  | NM_023149 | metabolic process                 | -17.7169 | 0        | Clpx          | NM_011802 | ATP catabolic process                                           | 15.6439  | 0        |
| Cpb2   | NM_019775 | metabolic process                 | -44.1734 | 0.000491 | Dnajb2        | NM_178055 | ER-associated protein<br>catabolic process                      | 13.06809 | 0        |
| Cpe    | NM_013494 | peptide<br>process                | 18.15287 | 0        | Fbxo2         | NM_176848 | protein catabolic process                                       | -13.158  | 0        |
| Ctps   | NM_016748 | glutamine<br>process              | -27.0776 | 0        | Hras1         | NM_008284 | GTP catabolic process                                           | -17.5152 | 0        |
| Ddc    | NM_016672 | carboxylic<br>metabolic process   | 19.948   | 0.003572 | Mgll          | NM_011844 | acylglycerol<br>process                                         | 13.61841 | 0        |
| Decr2  | NM_011933 | metabolic process                 | 16.13747 | 0        | Nt5c          | NM_015807 | deoxyribonucleotide<br>catabolic process                        | -14.398  | 0        |
| Dhdh   | NM_027903 | metabolic process                 | 20.92931 | 0.007365 | Psmb5         | NM_011186 | proteasomal<br>ubiquitin-dependent protein<br>catabolic process | -13.5789 | 0        |
| Mthfd2 | NM_008638 | metabolic process                 | -18.2857 | 0.005151 | Prkag3        | NM_153744 | fatty acid biosynthetic<br>process                              | 18.73279 | 7.91E-05 |
| Mtrp   | NM_008642 | cholesterol<br>process            | 29.14847 | 0        | Ptgis         | NM_008968 | fatty acid biosynthetic<br>process                              | 13.39598 |          |

|                      |           |                                                                  |          |          |          |              |                                                                  |          |          |
|----------------------|-----------|------------------------------------------------------------------|----------|----------|----------|--------------|------------------------------------------------------------------|----------|----------|
| <b>Dnmt1</b>         | NM_010066 | metabolic process                                                | -15.7024 | 0        | Rnaseh2b | NM_026001    | RNA catabolic process                                            | -25.3776 | 0        |
| <b>Enpp1</b>         | NM_008813 | 3'-phosphoadenosine<br>5'-phosphosulfate<br>metabolic process    | 14.65909 | 0        | Rbm8a    | NM_025875    | nuclear-transcribed<br>catabolic<br>process,<br>mRNA<br>process, | -37.196  | 2.28E-06 |
| <b>Enpp5</b>         | NM_032003 | metabolic process                                                | 13.16757 | 0        | Trim63   | NM_001039048 | nonsense-mediated decay<br>proteasomal                           | -15.1668 | 0        |
| <b>Eraf</b>          | NM_133245 | hemoglobin<br>process<br>metabolic                               | -26.8637 | 0.07265  | Tuba1a   | NM_011653    | GTP catabolic process                                            | -19.8711 | 0.05735  |
| <b>Es22</b>          | NM_133660 | metabolic process                                                | 15.23675 | 0        | Tuba1b   | NM_011654    | GTP catabolic process                                            | -20.9481 | 0        |
| <b>Fen1</b>          | NM_007999 | metabolic process                                                | -25.0497 | 0        | Tubb2c   | NM_146116    | GTP catabolic process                                            | -15.0473 | 0        |
| <b>Ftcd</b>          | NM_080845 | metabolic process                                                | 25.15024 | 0.000416 | Tubb5    | NM_011655    | GTP catabolic process                                            | -14.2874 | 0.003837 |
| <b>G6pc</b>          | NM_008061 | metabolic process                                                | 42.81719 | 0        | Tubb6    | NM_026473    | GTP catabolic process                                            | -25.8553 | 0.019231 |
| <b>Gnmt</b>          | NM_010321 | S-adenosylhomocysteine<br>metabolic process                      | 23.79311 | 1.63E-06 | Tubg1    | NM_134024    | GTP catabolic process                                            | -13.6329 | 0        |
| <b>Gsta2</b>         | NM_008182 | metabolic process                                                | 47.39519 | 0        | Ubd      | NM_023137    | ubiquitin-dependent<br>catabolic process<br>protein              | 15.86665 | 0        |
| <b>Gsta3</b>         | NM_010356 | metabolic process                                                | 40.84407 | 0        | Zfp36    | NM_011756    | mRNA catabolic process                                           | 25.04429 | 0        |
| <b>Serpinh1</b>      | NM_009825 | collagen<br>process<br>biosynthetic                              | -99.0544 | 0        | Scd1     | NM_009127    | fatty acid<br>biosynthetic<br>process                            | 17.46294 | 0        |
| <b>Nans</b>          | NM_053179 | metabolic process                                                | -19.8874 | 0        | Myo5a    | NM_010864    | metabolic process                                                | -29.6273 | 0.094674 |
| <b>2010001M09Rik</b> | NM_027222 | positive regulation of<br>immunoglobulin<br>biosynthetic process | 80.19955 | 0        | Gchfr    | NM_177157    | negative regulation of<br>biosynthetic process                   | 31.94091 | 0        |
| <b>Lyz2</b>          | NM_017372 | metabolic process                                                | 23.37959 | 0        | Gpt1     | NM_182805    | biosynthetic process                                             | 52.47594 | 0        |
| <b>Nr1h3</b>         | NM_013839 | cellular lipid<br>process<br>metabolic                           | -50.3543 | 0        |          |              |                                                                  |          |          |

|                           |           |                           |          |          |         |           |                                   |          |          |
|---------------------------|-----------|---------------------------|----------|----------|---------|-----------|-----------------------------------|----------|----------|
| Gstk1                     | NM_029555 | metabolic process         | 22.82957 | 0        | Lyz     | NM_013590 | metabolic process                 | 17.82854 | 0        |
| Gstp2                     | NM_181796 | metabolic process         | 60.22166 | 0        | Hya1l   | NM_008317 | metabolic process                 | 16.58008 | 3.65E-05 |
| Gstt1                     | NM_008185 | glutathione process       | 52.21402 | 0        | Agps    | NM_172666 | lipid biosynthetic process        | -14.9357 | 0        |
| Gstt2                     | NM_010361 | glutathione process       | 18.13774 | 0        | Ak31l   | NM_021299 | ADP biosynthetic process          | -19.8567 | 0        |
| Gusb                      | NM_010368 | metabolic process         | -13.5004 | 0        | Alas1   | NM_020559 | biosynthetic process              | 15.23939 | 0        |
| Hao3                      | NM_019545 | metabolic process         | 19.85823 | 0        | Alas2   | NM_009653 | biosynthetic process              | -19.7045 | 0        |
| Hsd11b1                   | NM_008288 | metabolic process         | -30.9663 | 0.000266 | Aldh11l | NM_027406 | biosynthetic process              | 21.07118 | 0        |
| Hsd17b2                   | NM_008290 | metabolic process         | 33.57007 | 0        | Alg1    | NM_145362 | biosynthetic process              | 40.64841 | 0        |
| 5430426F23Rik             | NM_023792 | coenzyme a process        | -14.4982 | 0        | Ass1    | NM_007494 | arginine biosynthetic process     | 13.69421 | 0        |
| Ith1l                     | NM_008406 | hyaluronan process        | 36.14559 | 0        | Atp12a  | NM_138652 | ATP biosynthetic process          | -79.4129 | 0.067308 |
| Chst1l                    | NM_021439 | carbohydrate process      | -14.4217 | 0.000252 | Atp5a1  | NM_007505 | ATP biosynthetic process          | -22.9414 | 0        |
| Ireb2                     | NM_022655 | metabolic process         | -20.795  | 0        | Immp2l  | NM_053122 | metabolic process                 | 35.471   | 0        |
| Kmo                       | NM_133809 | metabolic process         | 14.55305 | 0        | Kynu    | NM_027552 | metabolic process                 | 48.8839  | 0        |
| Degs2                     | NM_027299 | ceramide process          | 21.80249 | 0        | Elovl2  | NM_019423 | fatty acid biosynthetic process   | -22.9484 | 0.119658 |
| Lrat                      | NM_023624 | retinol metabolic process | 27.36704 | 0        | Fpgt    | NM_029330 | GDP-L-fucose biosynthetic process | 14.46022 | 0        |
| <b>Cellular component</b> |           |                           |          |          |         |           |                                   |          |          |
| 2610110G12Rik             | NM_028476 | Cellular component        | 13.3198  | 0        | Psmc3ip | NM_008949 | nucleus                           | -21.1945 | 0        |
| Abhd2                     | NM_018811 | integral to membrane      | -13.6163 | 2.70E-05 | S3-12   | NM_020568 | cytoplasm                         | 39.01733 | 0        |
| Cabp2                     | NM_013878 | Golgi apparatus           | -18.1624 | 0.098291 | Shfm1   | NM_009169 | proteasome complex                | -17.4677 | 0        |
| Ccdc50                    | NM_026202 | cytoplasm                 | -15.2109 | 0.004623 | Smcp    | NM_008574 | cytoplasm                         | -61.5544 | 0        |

|         |              |                                   |          |          |           |              |                                   |          |          |
|---------|--------------|-----------------------------------|----------|----------|-----------|--------------|-----------------------------------|----------|----------|
| Fga     | NM_010196    | extracellular space               | 51.35006 | 0        | Tmod3     | NM_016963    | cytoskeleton                      | -14.705  | 0        |
| Fstl1   | NM_008047    | extracellular region              | -71.276  | 0        | Tpm4      | NM_001001491 | cytoskeleton                      | -16.6039 | 0        |
| Fus     | NM_139149    | cytoplasm                         | 13.14109 | 4.62E-05 | Acta2     | NM_007392    | cytoskeleton                      | -19.4536 | 0.002326 |
| Glipr1  | NM_028608    | extracellular region              | 15.84268 | 0        | Arpc2     | NM_029711    | cytoskeleton                      | -18.9344 | 0        |
| Guca2a  | NM_008190    | extracellular region              | 16.83464 | 0        | Dctn1     | NM_007835    | cytoskeleton                      | -20.0498 | 0        |
| H2afz   | NM_016750    | chromosome                        | -13.639  | 0        | Fgf10     | NM_008002    | actin cytoskeleton reorganization | 15.2742  | 0.028909 |
| Herpud1 | NM_022331    | endoplasmic reticulum             | 15.59876 | 0        | Flrt1     | NM_201411    | integral to membrane              | 35.90355 | 0        |
| Hmgn2   | NM_016957    | nucleus                           | -34.1507 | 0.017279 | Flrt3     | NM_178382    | integral to membrane              | -22.0091 | 0        |
| Hspel   | NM_008303    | cytoplasm                         | -31.3728 | 0        | Gabarapl1 | NM_020590    | cytoskeleton                      | 20.65706 | 0        |
| Inmt    | NM_009349    | cytoplasm                         | 17.43349 | 0        | Gtse1     | NM_013882    | cytoskeleton                      | -25.1866 | 0.117478 |
| Inpp5k  | NM_008916    | cytosol                           | 14.83196 | 0        | H2-Q8     | NM_023124    | integral to membrane              | 16.0895  | 3.65E-05 |
| Ints7   | NM_178632    | nucleus                           | -14.9497 | 0        | Kif22     | NM_145588    | cytoskeleton                      | -91.0548 | 0.007479 |
| Ipnk    | NM_027184    | nucleus                           | 16.67279 | 0.000266 | Kif4      | NM_008446    | cytoskeleton                      | -24.6434 | 0.126589 |
| Mcm10   | NM_027290    | nucleus                           | -26.7486 | 0.005043 | Ly6a      | NM_010738    | anchored to membrane              | -23.7218 | 0        |
| Mfap2   | NM_008546    | platelet formation                | -13.0803 | 0.047046 | Ly6c1     | NM_010741    | anchored to membrane              | 23.48117 | 0        |
| Mkml    | NM_018810    | chromatin binding                 | -18.9252 | 0.001329 | Marcks    | NM_008538    | cytoskeleton                      | -23.6489 | 0        |
| Pif1    | NM_172453    | nucleus                           | -16.8245 | 0.075855 | Plekha7   | NM_172743    | cytoskeleton                      | 25.12792 | 0        |
| Plekhh1 | NM_013746    | cytoplasm                         | 55.56799 | 0        | S100a8    | NM_013650    | cytoskeleton                      | 97.00845 | 0        |
| Plekhh2 | NM_001033150 | cytoplasm                         | 22.34214 | 0        | S100a9    | NM_009114    | cytoskeleton                      | 106.6895 | 0        |
| Pole4   | NM_025882    | nucleus                           | -18.5546 | 0        | Sntg2     | NM_172951    | cytoskeleton                      | 33.89816 | 0        |
| Prep    | NM_054077    | extracellular region              | 17.43962 | 0        | Trpv4     | NM_022017    | actin cytoskeleton reorganization | -14.8109 | 0        |
| Ccdc80  | NM_026439    | extracellular matrix organization | -13.6749 | 0        | Spry3     | NM_001030293 | protein binding                   | -19.3695 | 0.463675 |
| Col4a4  | NM_007735    | extracellular matrix              | -29.53   | 0        | Stl3      | NM_133726    | cytoplasm                         | -14.0968 | 0        |
| Col4a5  | NM_007736    | structural constituent collagen   | -74.5682 | 0        | Tcf19     | NM_025674    | nucleus                           | -42.7251 | 0.014957 |

|               |              |                                                                                                 |           |            |               |           |                                                                           |          |          |
|---------------|--------------|-------------------------------------------------------------------------------------------------|-----------|------------|---------------|-----------|---------------------------------------------------------------------------|----------|----------|
| D630040I23Rik | NM_201411    | integral to membrane                                                                            | 42.71896  | 0          | Them2         | NM_025790 | cytoplasm                                                                 | -16.1401 | 0        |
| E130010M05Rik | NM_007735    | collagen                                                                                        | -45.0311  | 0          | Timd2         | NM_134249 | plasma membrane                                                           | 19.31788 | 0        |
| E1av1I        | NM_010485    | cytoplasm                                                                                       | -14.3118  | 0          | Tnnt1         | NM_011618 | tropoin complex                                                           | 15.04938 | 0        |
| E1n           | NM_007925    | extracellular matrix organization                                                               | -126.558  | 0.024573   | Wdfy1         | NM_027057 | cytosol                                                                   | -21.3266 | 0        |
| E14           | NM_178059    | cytoplasm                                                                                       | -14.9892  | 0          | 2700060E02Rik | NM_026528 | cytoskeleton                                                              | -17.8208 | 1.88E-06 |
| Col6a3        | XM_003085326 | extracellular matrix                                                                            | -24.8757  | 0.03764    | Tgolin1       | NM_009443 | Golgi apparatus                                                           | 13.99989 | 0        |
| C1sh          | NM_009895    | activation of protein kinase C activity by G-protein coupled receptor protein signaling pathway | -38.22456 | 0          | Errfi1        | NM_133753 | negative regulation of epidermal growth factor receptor signaling pathway | 51.17677 | 0        |
| Ctgf          | NM_010217    | intracellular signal transduction                                                               | 14.83047  | 0          | Per1          | NM_011065 | signal transduction                                                       | 35.68152 | 0        |
| Dag1          | NM_010017    | NLS-bearing import into nucleus                                                                 | -14.03697 | 0          | Per2          | NM_011066 | signal transduction                                                       | 17.99669 | 0.003026 |
| Dgkg          | NM_138650    | intracellular signal transduction                                                               | 102.9636  | 0          | Sh3bp2        | NM_011893 | SH3 domain binding                                                        | -75.0519 | 0        |
| Dok4          | NM_053246    | MAPKK cascade                                                                                   | -20.83082 | 0          | BC040758      | BC040758  | cell adhesion                                                             | -18.8796 | 0        |
| E430001K23Rik | NM_138650    | intracellular signal transduction                                                               | 20.21286  | 0.00534188 | Cd34          | NM_133654 | cell adhesion                                                             | -21.4587 | 0        |
| Emd           | NM_007927    | regulation of canonical Wnt receptor signaling pathway                                          | 13.89235  | 0          | Zc3h15        | NM_026934 | cytokine-mediated signaling pathway                                       | -23.3384 | 0        |
| C493          | NM_010740    | cell adhesion                                                                                   | -29.6149  | 0          | Cldn1         | NM_016674 | cell junction                                                             | 19.89177 | 0        |
| Egr1          | NM_007913    | BMP signaling pathway                                                                           | -20.12943 | 0          | Cldn12        | NM_022890 | cell junction                                                             | -19.1516 | 0        |
| Erb2          | NM_001003817 | cell surface receptor linked signaling pathway                                                  | 13.75799  | 0          | Nckap11       | NM_153505 | B cell receptor signaling pathway                                         | 15.78384 | 0        |

|          |              |                                      |         |           |             |               |              |                                              |         |           |            |
|----------|--------------|--------------------------------------|---------|-----------|-------------|---------------|--------------|----------------------------------------------|---------|-----------|------------|
| Ccgr     | NM_008101    | G-protein receptor signaling pathway | coupled | 17.09542  | 0           | Gna14         | NM_008137    | G-protein receptor protein signaling pathway | coupled | -104.013  | 0.4284188  |
| Col4a3   | NM_007734    | cell adhesion                        | coupled | -27.1379  | 0           | Col5a1        | NM_015734    | cell adhesion                                | coupled | -74.6412  | 0          |
| Gnaq     | NM_008139    | G-protein receptor signaling pathway | coupled | -34.14516 | 0.3103922   | Gng12         | NM_025278    | G-protein receptor protein signaling pathway | coupled | -16.66137 | 0.00011186 |
| Col6a1   | NM_009933    | cell adhesion                        | coupled | -31.0921  | 0.029075    | Col6a2        | NM_146007    | cell adhesion                                | coupled | -29.3723  | 0.03125    |
| Gpr23    | NM_175271    | G-protein receptor signaling pathway | coupled | -15.20435 | 0.001370284 | Gpr88         | NM_022427    | G-protein receptor protein signaling pathway | coupled | -65.60125 | 0.292735   |
| Col8a1   | NM_007739    | cell adhesion                        | coupled | -17.0852  | 0.000165    | C920006C10Rik | NM_133766    | cell-cell adhesion                           | coupled | -13.5957  | 0          |
| Pdlim4   | NM_019417    | metal ion binding                    | coupled | 14.52085  | 0           | D14Erttd171e  | NM_177814    | cell junction                                | coupled | -14.6108  | 0          |
| Prickle3 | NM_175097    | metal ion binding                    | coupled | -19.70836 | 0           | Lamc1         | NM_010683    | cell adhesion                                | coupled | -50.962   | 0          |
| Hes1     | NM_008235    | Notch signaling pathway              | coupled | 16.05576  | 0           | Iqgap3        | NM_001033484 | Ras protein transduction                     | signal  | -16.49386 | 0.769874   |
| Igh-6    | Z95476       | B cell receptor signaling pathway    | coupled | 80.21376  | 0           | Ighg          | AK131185     | B cell receptor signaling pathway            | coupled | 229.8634  | 0          |
| Mcam     | NM_023061    | cell adhesion                        | coupled | -16.8567  | 1.04E-07    | Nid1          | NM_010917    | cell adhesion                                | coupled | -22.4405  | 0.019113   |
| Lgals3bp | NM_011150    | cell adhesion                        | coupled | -18.4092  | 0           | Nid2          | NM_008695    | cell adhesion                                | coupled | -45.21    | 0          |
| Irs2     | NM_001081212 | signal transduction                  | coupled | 34.28046  | 0           | Nphp4         | NM_153424    | cell junction                                | coupled | -13.313   | 0.008547   |
| Lgals1   | NM_008495    | signal transduction                  | coupled | -25.66809 | 0           | Pcdh24        | NM_001033364 | cell adhesion                                | coupled | -15.849   | 0          |
| Mas1     | NM_008552    | signal transduction                  | coupled | -32.80442 | 0           | Tgfb1         | NM_009369    | cell adhesion                                | coupled | 13.61811  | 0          |
| Ncf4     | NM_008677    | cell communication                   | coupled | 13.74411  | 0           | Vcl           | NM_009502    | cell adhesion                                | coupled | -17.4275  | 0          |
| Fgg      | NM_133862    | signal transduction                  | coupled | 45.89006  | 0           | Col15a1       | NM_009928    | cell adhesion                                | coupled | -59.8793  | 0          |
| Fzd6     | NM_008056    | signal transduction                  | coupled | -14.04562 | 0           | Col16a1       | NM_028266    | cell adhesion                                | coupled | -14.5355  | 0          |
| Cldn6    | NM_018777    | cell junction                        | coupled | -15.9369  | 0.002137    |               |              |                                              |         |           |            |



|          |           |                                                      |           |            |          |              |                                                      |          |          |
|----------|-----------|------------------------------------------------------|-----------|------------|----------|--------------|------------------------------------------------------|----------|----------|
| Acvr1    | NM_007394 | BMP signaling pathway                                | -13.61456 | 0          | Sh3tc2   | NM_172628    | binding                                              | 22.20255 | 0        |
| Adrb2    | NM_007420 | G-protein coupled receptor protein signaling pathway | -24.46138 | 0          | Rgs11    | NM_001081069 | G-protein coupled receptor protein signaling pathway | 18.93368 | 0        |
| Adipoq   | NM_009605 | adiponectin-mediated signaling pathway               | 50.4836   | 0          | Rasgrp3  | NM_207246    | Ras protein signal transduction                      | -14.2104 | 0        |
| Agrap    | NM_009642 | G-protein coupled receptor protein signaling pathway | -23.98177 | 0          | Arhgef11 | NM_001003912 | G-protein coupled receptor protein signaling pathway | 13.2442  | 0        |
| Aplnr    | NM_011784 | G-protein coupled receptor protein signaling pathway | -46.25639 | 0.03418804 | Npb      | NM_153288    | G-protein coupled receptor protein signaling pathway | -15.4529 | 0        |
| Apoe     | NM_009696 | Cdc42 protein signal transduction                    | 47.79893  | 0          | Smoc1    | NM_022316    | signal transduction                                  | 31.1172  | 0        |
| Robld3   | NM_031248 | activation of MAPKK activity                         | -15.9922  | 0          | Soes2    | NM_007706    | intracellular signal transduction                    | -59.4885 | 0        |
| Arhgef3  | NM_027871 | intracellular signal transduction                    | 19.35631  | 0          | Sostdc1  | NM_025312    | Wnt receptor signaling pathway                       | -19.0935 | 0        |
| Cav1     | NM_007616 | MAPKK cascade                                        | -13.47767 | 0          | Sparc    | NM_009242    | signal transduction                                  | -59.6037 | 0.001835 |
| Cd3g     | NM_009850 | cell surface receptor linked signaling pathway       | 16.71161  | 0.00534188 | Spsb2    | NM_013539    | intracellular signal transduction                    | -20.8633 | 0        |
| Cdc42ep4 | NM_020006 | Rho protein signal transduction                      | 13.01725  | 0          | Tbxa2r   | NM_009325    | signal transduction                                  | -28.8648 | 2.28E-06 |
| Ceacam2  | NM_007543 | signal transduction                                  | 25.58617  | 5.14E-06   | Trf      | NM_133977    | SMAD protein signal transduction                     | 63.4724  | 0        |
